# Supplementary material
Source: PubMed Central journal article supplement (PMC549568)
Supplement: nar_33_4_1201__1.pdf [file nar_33_4_1201__1.pdf]

## Supplementary Material

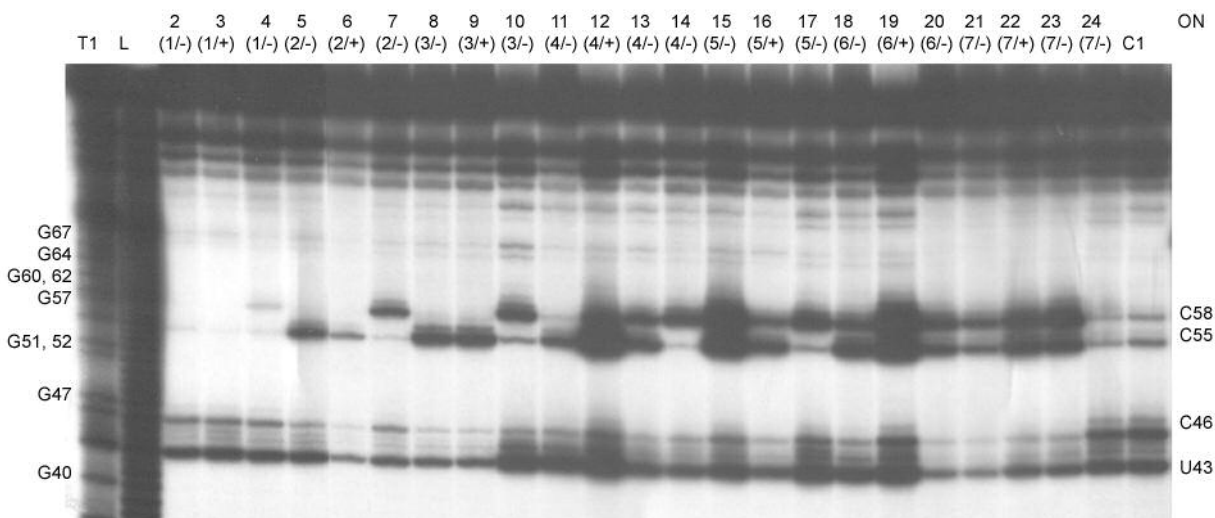

**Fig. 1.** Sensitivity of artificial RNA bulge-loops to cleavage with chemical ribonuclease ABL4C3 in the presence of 10 mM MgCl<sub>2</sub>. Products of M2-96 RNA:oligonucleotide duplex cleaved with compound ABL4C3 resolved in 18% denaturing PAAG (A). Oligonucleotide numbers are indicated on the top. C1 – cleavage of M2-96 RNA with ABL4C3 in the absence of oligonucleotide. C2 – incubation control. Lane L - imidazole ladder, lane T1 - RNA cleavage with RNase T1 under denaturing conditions. The cleaved bonds in M2-96 RNA are indicated on the right.
