# Supplementary material
Source: PubMed Central journal article supplement (PMC549568)
Supplement: nar_33_4_1201__2.pdf [file nar_33_4_1201__2.pdf]

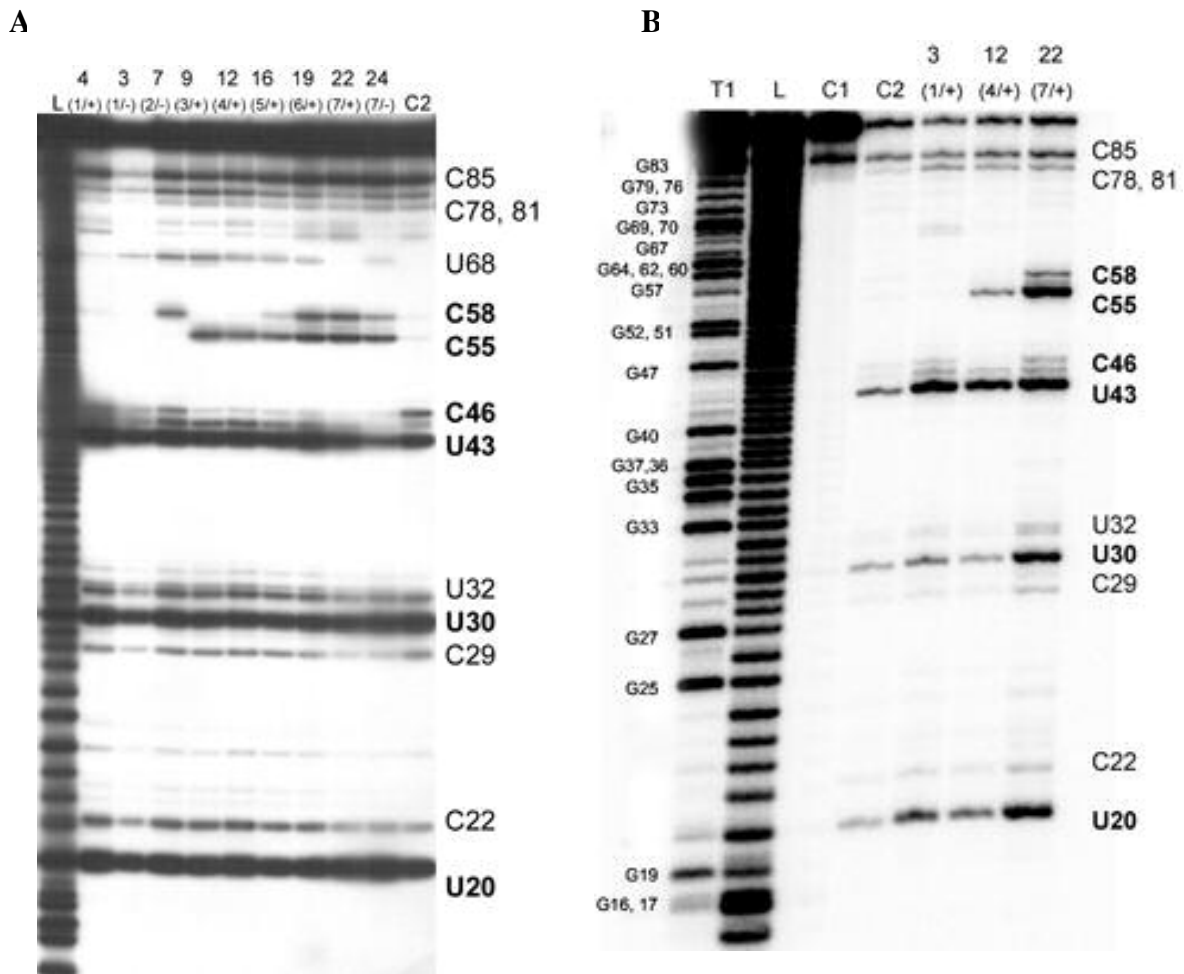

**Fig. 2.** Probing of M2-96 RNA:oligodeoxynucleotide complexes with RNase A in the absence (A) and in the presence (B) of 10 mM MgCl<sub>2</sub>. Radioautographs of denaturing 18% PAAG. Numbers of oligonucleotides are shown on the top. Lane L - imidazole ladder, lane T1 - RNA cleavage with RNase T1 under denaturing conditions, C1 - incubation control, C2 - control, incubation of the RNA with RNase A in the absence of oligodeoxynucleotide. The cleaved bonds in M2-96 RNA are indicated on the right. Cleavage conditions are described in Materials and Methods.
